# Supplementary material for: Biophysical, Biochemical, and Photochemical Analyses Using Reflectance Hyperspectroscopy and Chlorophyll a Fluorescence Kinetics in Variegated Leaves
Source: MDPI journal article supplement (doi:10.3390/biology12050704), 2023-05-11
Supplement: s1 [file s1]

Supplementary file

# Biophysical, Biochemical, and Photochemical Analyses Using Reflectance Hyperspectroscopy and Chlorophyll a Fluorescence Kinetics in Variegated Leaves

Renan Falcioni <sup>1,\*</sup>, Werner Camargos Antunes <sup>1</sup>, José A. M. Demattê <sup>2</sup> and Marcos Rafael Nanni <sup>1</sup>

<sup>1</sup> Department of Agronomy, State University of Maringá, Av. Colombo, 5790, Maringá 87020-900, Paraná, Brazil; wcantunes@uem.br (W.C.A.); mrnanni@uem.br (M.R.N.)

<sup>2</sup> Department of Soil Science, Luiz de Queiroz College of Agriculture, University of São Paulo, Av. Pádua Dias, 11, Piracicaba 13418-260, São Paulo, Brazil; jamdemat@usp.br

\* Correspondence: renanfalcioni@gmail.com; Tel.: +55-44-3011-8940

**Table S1.** Biophysical, biochemical and photochemical parameters-based efficiency-related for vegetation indexes (VIs).

| Index                                                                       | Equation                                              | Reference  |
|-----------------------------------------------------------------------------|-------------------------------------------------------|------------|
| NDVI <sub>680</sub> = Normalized Difference Vegetation Index q680           | $(R_{800}-R_{680})/(R_{800}+R_{680})$                 | [23,29,66] |
| NDVI <sub>750</sub> = Normalized Difference Vegetation Index q750           | $(R_{750}-R_{705})/(R_{750}+R_{705})$                 |            |
| SR <sub>680</sub> = Simple Ratio Index q680                                 | $(R_{800}/R_{680})$                                   | [66]       |
| SR <sub>705</sub> = Simple Ratio Index q705                                 | $(R_{750})/(R_{705})$                                 |            |
| mSR <sub>705</sub> = Modified Normalized Simple Ratio q705                  | $(R_{750}-R_{445})/(R_{705}+R_{445})$                 | [66]       |
| mNDVI <sub>750</sub> = Modified Normalized Difference Vegetation Index q750 | $(R_{750}-R_{705})/(R_{750}+R_{705}-2\times R_{445})$ |            |
| RARS = Ratio Analysis of Reflectance Spectra                                | $(R_{746})/(R_{513})$                                 | [66]       |
| Achl = Absorption of Chlorophyll Index                                      | $(R_{550})/(R_{500})$                                 |            |
| BNb = Index for Chlorophyll Content                                         | $(R_{800})/(R_{550})$                                 | [66]       |
| PVR = Normalized Difference Photosynthetic                                  | $(R_{550}-R_{650})/(R_{550}+R_{650})$                 |            |
| PSND = Pigment Specific Normalized Difference                               | $(R_{800}-R_{470})/(R_{800}+R_{470})$                 | [66]       |
| PSSRa = Pigment Specific Simple Ratio Chl <i>a</i>                          | $(R_{800})/(R_{680})$                                 |            |
| PSSRb = Pigment Specific Simple Ratio Chl <i>b</i>                          | $(R_{800})/(R_{635})$                                 | [67]       |
| PSSRc = Pigment-specific Simple Ratio                                       | $(R_{800})/(R_{500})$                                 |            |
| PSRI = Plant Senescence Reflectance Index                                   | $(R_{680}-R_{500})/(R_{750})$                         | [68]       |
| PSRI2 = Plant Senescence Reflectance Index 2                                | $(R_{672})/(R_{550}+R_{708})$                         |            |
| MSI = Moisture Stress Index                                                 | $(R_{1650}/R_{830})$                                  | [68]       |
| PRI = Photochemical Reflectance Index                                       | $(R_{530}-R_{570})/(R_{530}+R_{570})$                 |            |
| FR = Fluorescence Ratio                                                     | $(R_{690})/(R_{740})$                                 | [69-73]    |
| WBI = Water Band Index                                                      | $(R_{900})/(R_{970})$                                 |            |
| DSWI = Disease-Water Stress Index                                           | $(R_{802}+R_{547})/(R_{1657}+R_{682})$                | [70]       |
| DSWI-5 = Disease-Water Stress Index 5                                       | $(R_{800}-R_{550})/(R_{1660}+R_{680})$                |            |
| CRI1 = Carotenoid Reflectance Index 1                                       | $(1/R_{510}) - (1/R_{550})$                           | [70]       |
| CRI2 = Carotenoid Reflectance Index 2                                       | $(1/R_{510}) - (1/R_{700})$                           |            |
| ARI1 = Anthocyanin Reflectance Index                                        | $(1/R_{550}) - (1/R_{700})$                           | [70]       |

|                                               |                                                                               |         |
|-----------------------------------------------|-------------------------------------------------------------------------------|---------|
| ARI2 = Anthocyanin Reflectance Index 2        | $R_{800} \times ((1/R_{550}) - (1/R_{700}))$                                  |         |
| FRI = Flavonol Reflectance Index              | $R_{800} \times ((1/R_{410}) - (1/R_{460}))$                                  | [71]    |
| VOG1 = Vogelmann Index 1                      | $(R_{740})/(R_{720})$                                                         |         |
| VOG2 = Vogelmann Index 2                      | $(R_{734}-R_{747})/(R_{715}+R_{726})$                                         | [70]    |
| SIPI = Structurally Insensitive Pigment Index | $(R_{800}-R_{445})/(R_{800}-R_{680})$                                         |         |
| CAI1 = Cellulose Absorption Index 1           | $100 \times (0.5(R_{2030}+R_{2210}) - R_{2100})$                              | [71]    |
| CAI2 = Cellulose Absorption Index 2           | $0.5 \times (R_{2020}+R_{2220}) - R_{2100})$                                  |         |
| NDLI = Normalized Difference Lignin Index     | $[\log(1/R_{1754}) - \log(1/R_{1680})]/[\log(1/R_{1754}) + \log(1/R_{1680})]$ | [72–76] |
| NDNI = Normalized Difference Nitrogen Index   | $[\log(1/R_{1510}) - \log(1/R_{1680})]/[\log(1/R_{1510}) + \log(1/R_{1680})]$ | [77]    |

**Table S2.** Parameter derivation of OJIP chlorophyll *a* fluorescence kinetics induction.

| Information selected from the fast OJIP fluorescence induction (data necessary for the calculation of the so-called JIP test parameters - LiCor-6800-Multiphase Flash™ Fluorometer - induction curves) |                                                                                                                                                                                                                                                                                      |
|--------------------------------------------------------------------------------------------------------------------------------------------------------------------------------------------------------|--------------------------------------------------------------------------------------------------------------------------------------------------------------------------------------------------------------------------------------------------------------------------------------|
| Fluorescence parameters                                                                                                                                                                                |                                                                                                                                                                                                                                                                                      |
| $F_O = F_{20 \mu s}$                                                                                                                                                                                   | First reliable fluorescence value after the onset of actinic illumination; used as initial value of the fluorescence                                                                                                                                                                 |
| $F_{50 \mu s}$                                                                                                                                                                                         | Fluorescence value at 50 $\mu s$                                                                                                                                                                                                                                                     |
| $F_{100 \mu s}$                                                                                                                                                                                        | Fluorescence value at 100 $\mu s$ (L-level)                                                                                                                                                                                                                                          |
| $F_{300 \mu s}$                                                                                                                                                                                        | Fluorescence value at 300 $\mu s$ (K-level)                                                                                                                                                                                                                                          |
| $F_J \equiv F_{2 ms}$                                                                                                                                                                                  | Fluorescence value at 2 ms (J-level)                                                                                                                                                                                                                                                 |
| $F_I \equiv F_{30 ms}$                                                                                                                                                                                 | Fluorescence value at 30 ms (I-level)                                                                                                                                                                                                                                                |
| $F_P \equiv F_M$                                                                                                                                                                                       | Fluorescence value at the peak of OJIP curve; maximum value under saturating light                                                                                                                                                                                                   |
| $t_{Fmax} \equiv t_{FM}$                                                                                                                                                                               | Time to reach the maximum fluorescence value $F_M$                                                                                                                                                                                                                                   |
| Area                                                                                                                                                                                                   | Area between OJIP curve and the line $F = F_M$ ; also total complementary area (from time 0 to $t_{Fmax}$ ) over the fluorescence induction curve is a measure of the number of quanta not emitted as fluorescence as a consequence of the photochemistry during the induction phase |
| Technical fluorescence parameters                                                                                                                                                                      |                                                                                                                                                                                                                                                                                      |
| $F_O/F_M$                                                                                                                                                                                              | Expresses the ratio fluorescence in leaves acclimated in dark and maximum fluorescence after saturation pulse light ( $13,000 \mu mol m^{-2} s^{-1}$ )                                                                                                                               |
| $F_V/F_O$                                                                                                                                                                                              | Expresses the ratio between variable ( $F_M - F_O$ ) fluorescence and initial fluorescence ( $F_O$ )                                                                                                                                                                                 |
| $V_t \equiv F_O/F_V \equiv (F_t - F_O)/(F_M - F_O)$                                                                                                                                                    | Relative variable fluorescence                                                                                                                                                                                                                                                       |
| $M_o \equiv (dV/dt)_o \equiv (\Delta V/\Delta t)_o$                                                                                                                                                    | Expresses the rate of the RC's closure                                                                                                                                                                                                                                               |
| $(dVG/dt)_o \equiv (\Delta VG/\Delta t)_o$                                                                                                                                                             | Expresses the excitation energy transfer between the RCs                                                                                                                                                                                                                             |
| N                                                                                                                                                                                                      | Expresses how many time $Q_A$ has been reduced in the time span from time 0 ( $t=0$ ) to $t_{FM}$                                                                                                                                                                                    |
| $S_M \equiv Area/F_V$                                                                                                                                                                                  | Normalized area (assumed proportional to the number of reduction and oxidation of one $Q_A^-$ molecule during the fast OJIP transient, and therefore related to the number of                                                                                                        |

|                                                                                                                       |                                                                                                                                                 |
|-----------------------------------------------------------------------------------------------------------------------|-------------------------------------------------------------------------------------------------------------------------------------------------|
|                                                                                                                       | electron carriers per electron transport chain. <b>This a measure of the energy needed to close all reaction centers</b>                        |
| $V_J$                                                                                                                 | Variable fluorescence 2 ms (J-value)                                                                                                            |
| $V_I$                                                                                                                 | Variable fluorescence 30 ms (I-value)                                                                                                           |
|                                                                                                                       |                                                                                                                                                 |
| <b>Definitions of energy fluxes at joules (J)</b>                                                                     |                                                                                                                                                 |
| $J^{ABS} = J^{TR} + J^{DI}$                                                                                           | Rate of photons absorption by total PSII antenna-denoted as <i>absorbed photon flux</i>                                                         |
| $J^{TRo}$                                                                                                             | Maximum (initial) trapped flux                                                                                                                  |
| $J^{ETo}$                                                                                                             | Electron transport flux $Q_A$ to $Q_B$                                                                                                          |
| $J^{DI}$                                                                                                              | Rate of energy dissipation in all the PSIIs, in processes other than trapping – denoted as <i>dissipated energy flux</i>                        |
| $J^{REo}$                                                                                                             | Electron transport flux until PSI acceptors (defined at $t=30$ ms, corresponding to the 1-level)                                                |
|                                                                                                                       |                                                                                                                                                 |
| <b>Quantum yields, efficiencies and rates/probabilities</b>                                                           |                                                                                                                                                 |
| $\psi_{(EO)} \equiv \psi_o = ET_o/TR_o = 1 - V_J$                                                                     | Efficiency/probability with which a PSII trapped electron is transferred from $Q_A$ to $Q_B$                                                    |
| $\psi_{(RO)} \equiv \psi_o = RE_o/TR_o = 1 - V_I$                                                                     | Efficiency/probability with which a PSII trapped electron is transferred until PSI acceptors                                                    |
| $\varphi_{(PO)} = TR_o/ABS \equiv 1 - F_o/F_M \equiv F_v/F_M$                                                         | Maximum quantum yield of primary PSII photochemistry                                                                                            |
| $\varphi_{(EO)} = ET_o/ABS \equiv [F_v/F_M \times (1 - V_J)]$                                                         | Quantum yield for electron transport the $Q_A^-$ for the electron acceptor intersystem                                                          |
| $\varphi_{(RO)} = RE_o/ABS \equiv (1 - F_o/F_M) \times (1 - V_I) \equiv \varphi_{(PO)} - \psi_{(EO)} - \delta_{(RO)}$ | Quantum yield for electron transport (from $Q_A^-$ ) to the final electron acceptor of the PSI                                                  |
| $\varphi_{(DO)} = 1 - \varphi_{(PO)} \equiv F_o/F_M$                                                                  | Expresses the probability that the energy of an absorbed photon is dissipated as heat                                                           |
| $\delta_{(RO)} = RE_o/ET_o \equiv (1 - V_I)/(1 - V_J)$                                                                | Efficiency/probability with which an electron from $Q_B$ is transferred until PSI acceptors                                                     |
| $Q_{(RO)} = RE_o/TR_o \equiv (1 - V_I)/(1 - F_o)$                                                                     | Efficiency with which an excitation can move an electron within the $Q_A^-$ electron transport chain to the final electron acceptors of the PSI |
|                                                                                                                       |                                                                                                                                                 |
| <b>Specific energy fluxes (per active PSII reaction center)</b>                                                       |                                                                                                                                                 |
| $ABS/RC = (M_o/V_J) \times (1 \times \varphi_{(PO)})$                                                                 | Average absorbed photon flux per PSII reaction center (or also, apparent antenna size of an active PSII)                                        |
| $TR_o/RC = M_o/V_J$                                                                                                   | Maximum trapped exciton flux per PSII                                                                                                           |
| $ET_o/RC = (M_o/V_J) \times (1 - V_J)$                                                                                | Electron transport flux from $Q_A$ to $Q_B$ per PSII                                                                                            |
| $RE_o/RC = (M_o/V_J) \times (1 - V_I)$                                                                                | Electron transport flux until PSI acceptors per PSII                                                                                            |
| $DI_o/RC = ABS/RC - TR_o/RC$                                                                                          | Dissipated energy flux per RC                                                                                                                   |
|                                                                                                                       |                                                                                                                                                 |
| <b>Phenomenological energy fluxes [per excited cross-section (CS) in <math>t=0</math> or <math>t=\max</math>]</b>     |                                                                                                                                                 |
| $RC/CS_o$                                                                                                             | Relative number of active PSII reaction center per excited cross-section at $t=0$                                                               |
| $ABS/CS_o$                                                                                                            | Absorbed photon flux per cross-section (or also, apparent PSII antenna size) at $t=0$                                                           |
| $TR_o/CS_o$                                                                                                           | Excitation energy flux trapped by PSII of photosynthesizing sample at $t=0$                                                                     |
| $ET_o/CS_o$                                                                                                           | Electron flux transported by PSII of a photosynthesizing sample at $t=0$                                                                        |
| $DI_o/CS_o$                                                                                                           | Heat dissipation of excitation energy by PSII of photosynthesizing sample CS at $t=0$                                                           |

|                                                                                           |                                                                                                                       |
|-------------------------------------------------------------------------------------------|-----------------------------------------------------------------------------------------------------------------------|
| RC/CS <sub>M</sub>                                                                        | Relative number of active PSII reaction centers per excited cross-section $t=max$                                     |
| ABS/CS <sub>M</sub>                                                                       | Absorption flux per cross-section $\sim F_M$ at $t=max$                                                               |
| TR <sub>O</sub> /CS <sub>M</sub>                                                          | Maximum trapped exciton flux per cross-section at $t=max$                                                             |
| ET <sub>O</sub> /CS <sub>M</sub>                                                          | Electron transport flux from Q <sub>A</sub> to Q <sub>B</sub> per cross section at $t=max$                            |
| DI <sub>O</sub> /CS <sub>M</sub>                                                          | Heat dissipation of excitation energy by PSII of a photosynthesizing sample cross-section $t=max$                     |
|                                                                                           |                                                                                                                       |
| <b>De-excitation rate constants of PSII antenna</b>                                       |                                                                                                                       |
| $k_N = k_F \times (M_O/V)/F_M$                                                            | Nonphotochemical de-excitation rate constant; $k_F$ being the rate constant for fluorescence emission                 |
| $k_P = k_N \times F_V/F_O$                                                                | Photochemical de-excitation rate constant                                                                             |
|                                                                                           |                                                                                                                       |
| <b>“Performance” indexes (combination of parameters)</b>                                  |                                                                                                                       |
| SFI <sub>(Abs)</sub>                                                                      | Structure function index                                                                                              |
| PI <sub>(Abs)</sub>                                                                       | Performance index for energy conservation from photons absorbed by PSII antenna, until the reduction of PSI acceptors |
| PI <sub>(CS<sub>O</sub>)</sub>                                                            | Performance index on cross section basis at $t=0$                                                                     |
| PI <sub>(CS<sub>M</sub>)</sub>                                                            | Performance index on cross section basis at $t=max$                                                                   |
|                                                                                           |                                                                                                                       |
| <b>Driving forces of photosynthesis (total driving forces for photochemical activity)</b> |                                                                                                                       |
| D.F. <sub>(Abs)</sub> = $\log (PI_{(Abs)})$                                               | Driving force on absorption basis                                                                                     |
| D.F. <sub>(CS<sub>O</sub>)</sub> = $\log (PI_{(CS_O)})$                                   | Driving force on cross-section basis initial at $t=0$                                                                 |
| D.F. <sub>(CS<sub>M</sub>)</sub> = $\log (PI_{(CS_M)})$                                   | Driving force on cross-section basis final at $t=max$                                                                 |

Subscript “0” indicates that the parameter refers to the onset of illumination — [29]. Strasser, R.J.; Srivastava, A.; Tsimilli-Michael, M. The Fluorescence Transient as a Tool to Characterize and Screen Photosynthetic Samples. In Probing Photosynthesis: Mechanisms, Regulation and Adaptation; 1st Eds; CRC Press: London, UK, 2000; pp. 443–480.

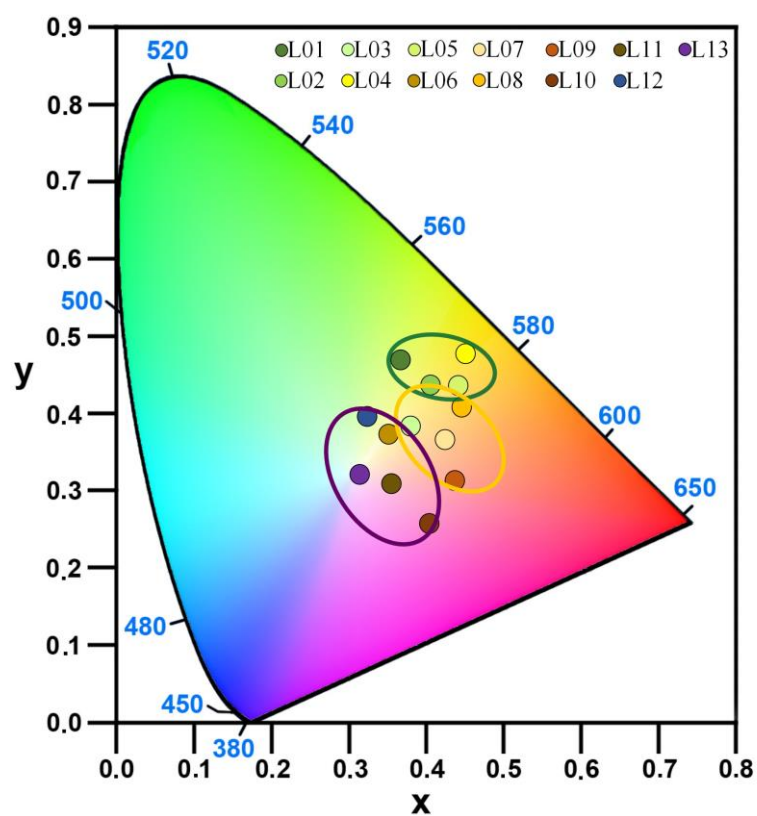

**Figure S1.** Chromaticity index obtained using single linkage Euclidean distances and the formation of three clusters associated with variegated leaves that are green, yellow, and red-purple.

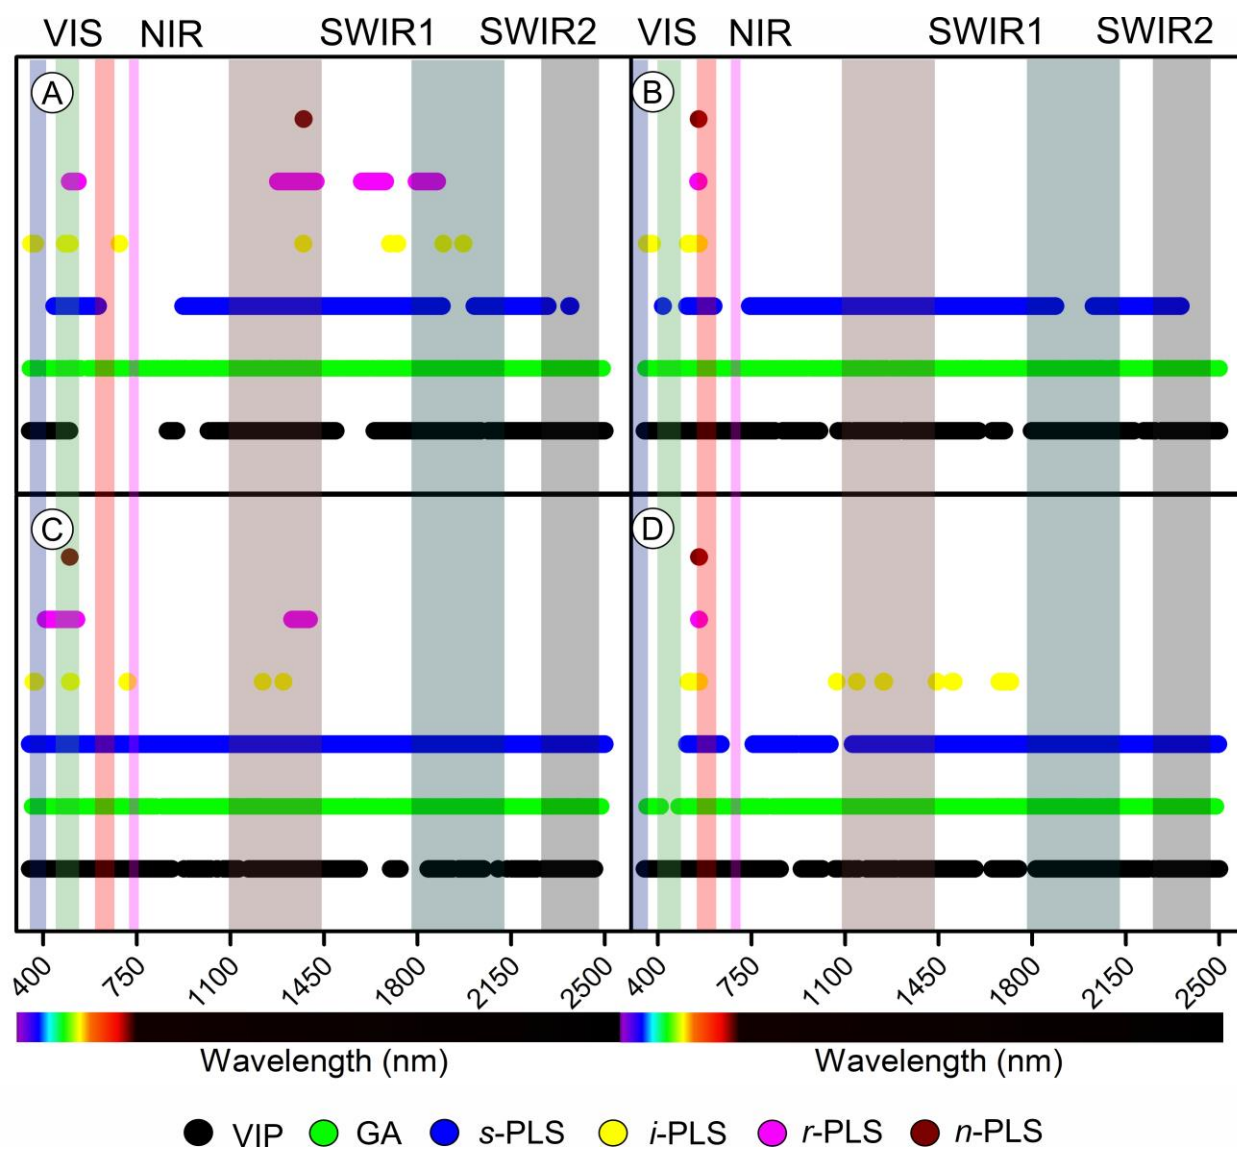

**Figure S2.** Selected most responsive variables among the wavelengths of 350-2500 nm by VIP, GA, s-PLS, i-PLS, r-PLS, n-PLS algorithms for variegated leaves. (A) Weight (g). (B) Leaf area (m<sup>2</sup>). (C) Specific leaf area (cm<sup>2</sup> g<sup>-1</sup>). (D) Estimated leaf thickness (μm).

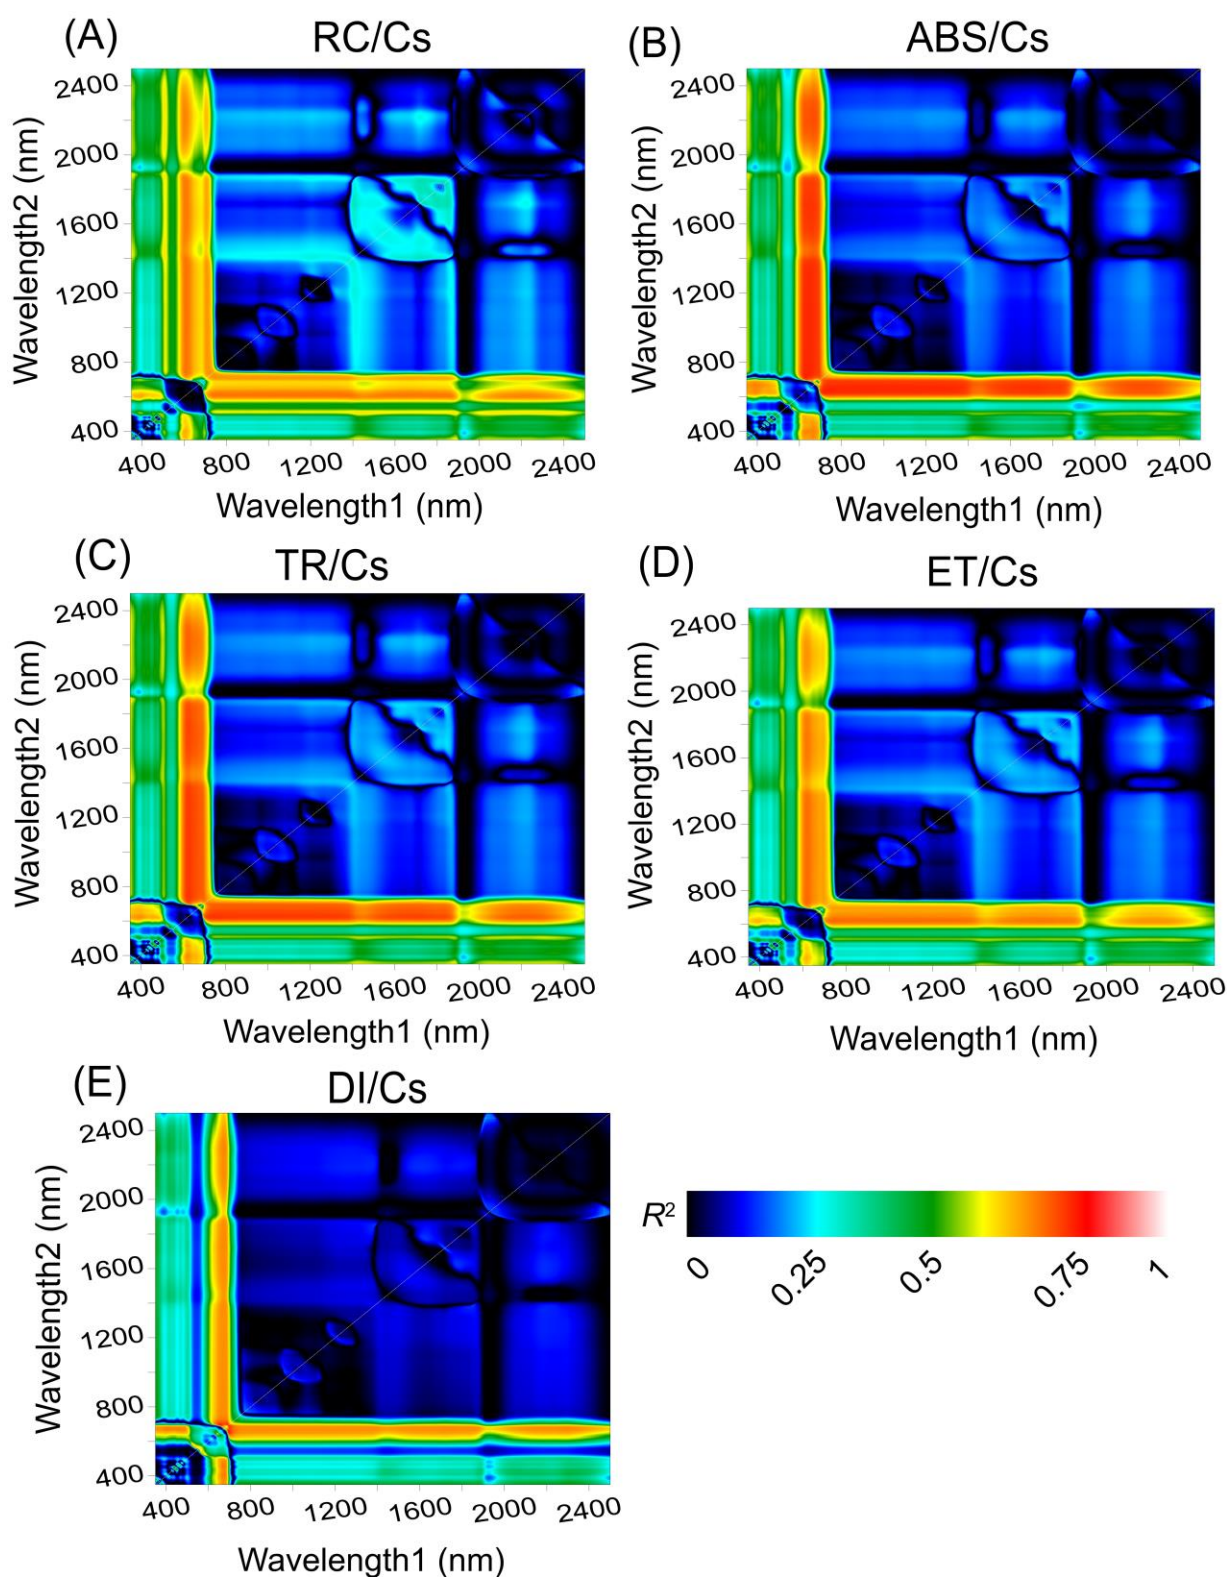

**Figure S3.** Count plot map of coefficient of correlation ( $R^2$ ) from the linear regression between phenomenological energy flow through excited cross-sections (CSs) of *Codiaeum variegatum* (L.) A. Juss leaves and wavelengths1 vs wavelength2 for 350 to 2500 nm. (A) RC/CS, indicate the % of active/inactive reaction centers. (B) ABS/CS, absorption flow by approximate CS; (C) TR/CS, energy flow trapped by CS. (D) ET/CS, electron transport flow by CS. (E) DI/CS, energy flow dissipated by CS. Dark blue to red displayed increased associations.

## References

23. Gitelson, A. Nondestructive Estimation of Foliar Pigments (Chlorophylls, Carotenoids, and Anthocyanins) Contents: Evaluating a Semianalytical Three-Band Model. In *Hyperspectral remote sensing of vegetation*; Thenkabail, P.S., Lyon, J.G., Huete, A., Eds.; CRC Press: New York, NY, USA 2011; p. 782.
29. Strasser, R.J.; Srivastava, A.; Tsimilli-Michael, M. The Fluorescence Transient as a Tool to Characterize and Screen Photosynthetic Samples. In *Probing Photosynthesis: Mechanisms, Regulation and Adaptation*; 1st Eds; CRC Press: London, UK, 2000; pp. 443–480.
66. Gitelson, A.; Merzlyak, M.N. Spectral Reflectance Changes Associated with Autumn Senescence of *Aesculus hippocastanum* L. and *Acer platanoides* L. Leaves. Spectral Features and Relation to Chlorophyll Estimation. *J. Plant Physiol.* **1994**, *143*, 286–292.
67. Chappelle, E.W.; Kim, M.S.; McMurtrey, J.E. Ratio Analysis of Reflectance Spectra (RARS): An Algorithm for the Remote Estimation of the Concentrations of Chlorophyll A, Chlorophyll B, and Carotenoids in Soybean Leaves. *Remote Sens. Environ.* **1992**, *39*, 239–247.
68. Pontius, J.; Martin, M.; Plourde, L.; Hallett, R. Ash Decline Assessment in Emerald Ash Borer-Infested Regions: A Test of Tree-Level, Hyperspectral Technologies. *Remote Sens. Environ.* **2008**, *112*, 2665–2676.
69. Metternicht, G. Vegetation Indices Derived from High-Resolution Airborne Videography for Precision Crop Management. *Int. J. Remote Sens.* **2003**, *24*, 2855–2877.
70. Blackburn, G.A. Spectral Indices for Estimating Photosynthetic Pigment Concentrations: A Test Using Senescent Tree Leaves. *Int. J. Remote Sens.* **1998**, *19*, 657–675.
71. Merzlyak, M.N.; Chivkunova, O.B.; Solovchenko, A.E.; Naqvi, K.R. Light Absorption by Anthocyanins in Juvenile, Stressed, and Senescing Leaves. *J. Exp. Bot.* **2008**, *59*, 3903–3911.
72. Garbulsky, M.F.; Peñuelas, J.; Gamon, J.; Inoue, Y.; Filella, I. The Photochemical Reflectance Index (PRI) and the Remote Sensing of Leaf, Canopy and Ecosystem Radiation Use Efficiencies. A Review and Meta-Analysis. *Remote Sens. Environ.* **2011**, *115*, 281–297.
73. Lang, M.; Stober, F.; Lichtenthaler, H.K. Fluorescence Emission Spectra of Plant Leaves and Plant Constituents. *Radiat. Environ. Biophys.* **1991**, *30*, 333–347.
74. Stimson, H.C.; Breshears, D.D.; Ustin, S.L.; Kefauver, S.C. Spectral Sensing of Foliar Water Conditions in Two Co-Occurring Conifer Species: *Pinus edulis* and *Juniperus monosperma*. *Remote Sens. Environ.* **2005**, *96*, 108–118.
75. Apan, A.; Held, A.; Phinn, S.; Markley, J. Formulation and Assessment of Narrow-Band Vegetation Indices from EO-1 Hyperion Imagery for Discriminating Sugarcane Disease. In Proceedings of the Spatial Sciences Institute Biennial Conference (SSC 2003): Spatial Knowledge Without Boundaries, Canberra, Australia 22–27 Sep 2003; pp. 1–13.
76. Nagler, P.L.; Inoue, Y.; Glenn, E.P.; Russ, A.L.; Daughtry, C.S.T. Cellulose Absorption Index (CAI) to Quantify Mixed Soil–Plant Litter Scenes. *Remote Sens. Environ.* **2003**, *87*, 310–325.
77. Serrano, L.; Peñuelas, J.; Ustin, S.L. Remote Sensing of Nitrogen and Lignin in Mediterranean Vegetation from AVIRIS Data: Decomposing Biochemical from Structural Signals. *Remote Sens. Environ.* **2002**, *81*, 355–364.

**Disclaimer/Publisher’s Note:** The statements, opinions and data contained in all publications are solely those of the individual author(s) and contributor(s) and not of MDPI and/or the editor(s). MDPI and/or the editor(s) disclaim responsibility for any injury to people or property resulting from any ideas, methods, instructions or products referred to in the content.
